# Supplementary material
Source: publisher site journal article supplement (https://www.dovepress.com/article/276301)
Supplement: Supplementary file 1 [file get_supplementary_file.php]

Supplementary Information


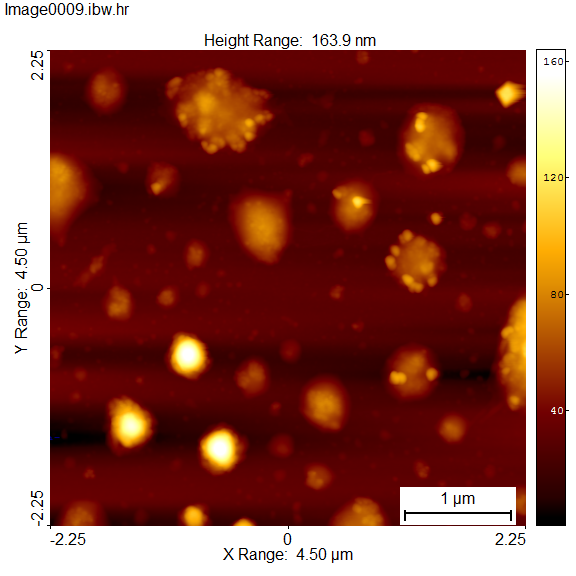


**Figure S1** Non-contact mode Atomic Force Microscope image of plant stanol ester solid lipid nanoparticles, 4.5 × 4.5 µm scan size.

**Figure S2** Mean particle diameter of plant stanol ester loaded solid lipid nanoparticles stored at 4 °C (blue) and 22 °C (orange) as measured by particle tracking analysis.

**Figure S3** Calibration curve of phytostanol.

|  | **Phase contrast** | **Fluorescence** |
| --- | --- | --- |
| 1. **HepG2** | 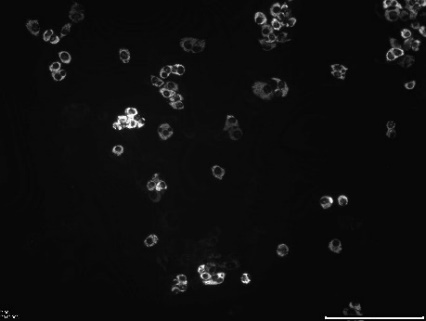 | 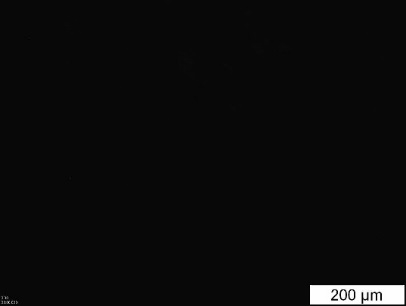 |
| 1. **HepG2** | 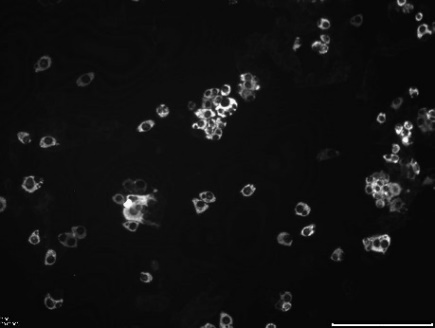 | 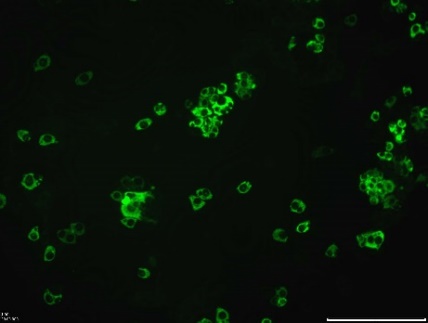 |
| **(c) HT-29** | 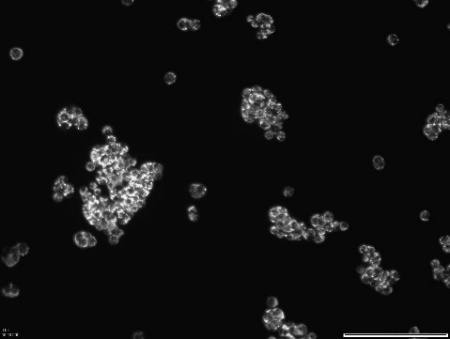 | 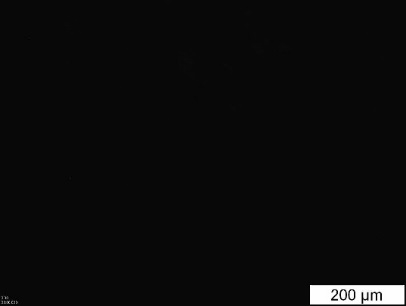 |
| **(d) HT-29** | 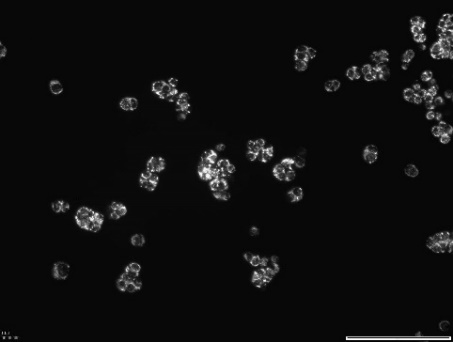 | 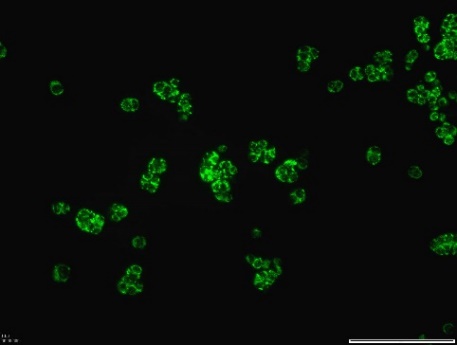 |

**Figure S4** Cellular uptake of SLNPs post 2 hours incubation as imaged by fluorescence microscopy.

(a) Untreated HepG2 (b) R123 SLNPs at 37 °C (c) Untreated HT-29 and (d) R123 SLNPs at 37 °C. The green fluorescence is due to Rhodamine123 encapsulated within the solid lipid nanoparticles. The scale bars in the images represent 200 μm.
